# Supplementary material for: Simulation of UV absorption spectra and relaxation dynamics of uracil and uracil–water clusters
Source: Royal Society of Chemistry journal article supplement (doi:10.1039/d0cp05618a), 2020-12-29
Supplement: d0cp05618a1.pdf [file d0cp05618a1.pdf]

Supporting information

for

Simulation of UV Absorption Spectra and Relaxation  
Dynamics of Uracil and Uracil-Water Clusters

B. Milovanović<sup>†</sup>, J. Novak<sup>‡</sup>, M. Etinski<sup>†</sup>, W. Domcke<sup>¶</sup> and N. Došlić<sup>‡</sup>

<sup>†</sup>*Faculty of Physical Chemistry, University of Belgrade, 11000 Belgrade, Serbia*

<sup>‡</sup>*Department of Physical Chemistry, Ruder Bošković Institute, 10000 Zagreb, Croatia*

<sup>‡</sup>*Higher Medical and Biological School, South Ural State University, Chelyabinsk,  
Russia*

<sup>¶</sup>*Department of Chemistry, Technical University of Munich, Garching, Germany*

## UV-vis spectra of DNA bases

UV-vis spectrum of uracil was measured in mQ-water at 25°C on a PG T80/T80+ spectrometer. The stock solution of uracil was prepared by dissolving 2.32 mg in water (10 mL), and this solution was then diluted twenty times. A UV-vis cell was filled with the solution of uracil (2.0 mL) and an UV-vis spectrum was taken. This solution was then diluted with water and after each dilution a spectrum was measured. Dependence of the absorbance on the base concentration was fit to linear equation and the molar absorption coefficient was determined from the slope.

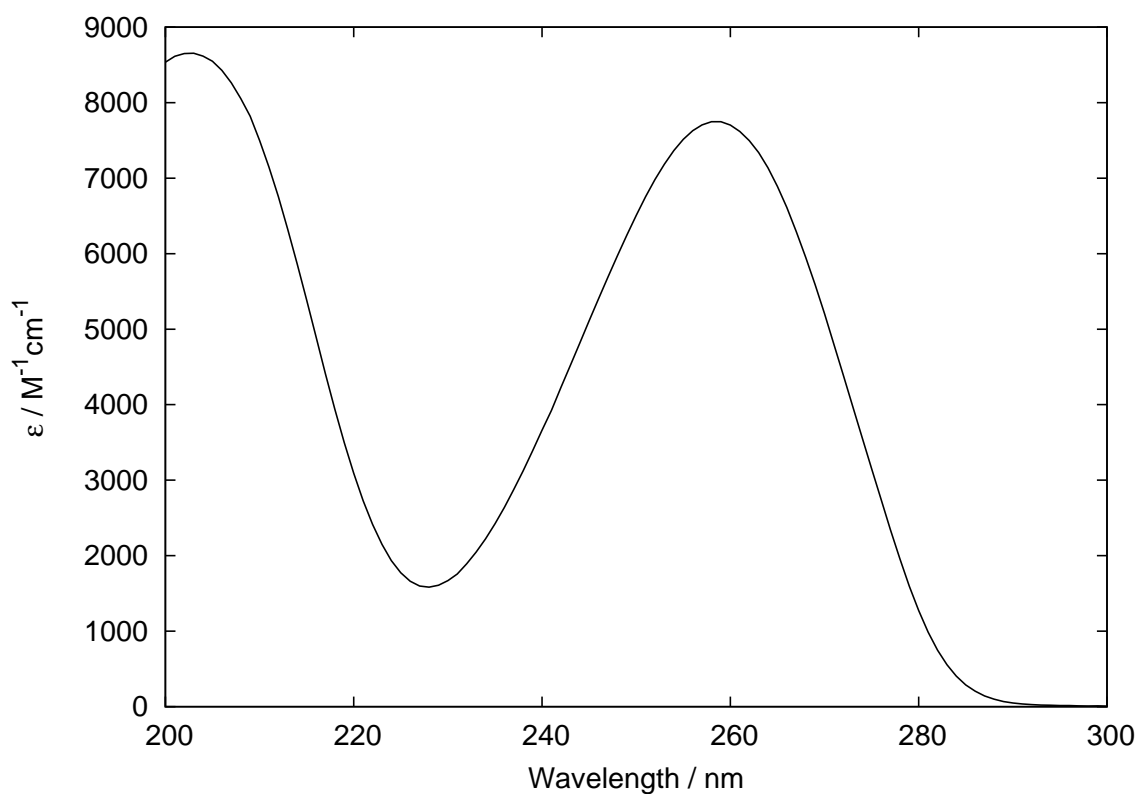

Figure S 1: Absorption spectrum of uracil in  $\text{H}_2\text{O}$  ( $\epsilon_{258} = 7680 \pm 20 \text{ M}^{-1} \text{cm}^{-1}$ ).

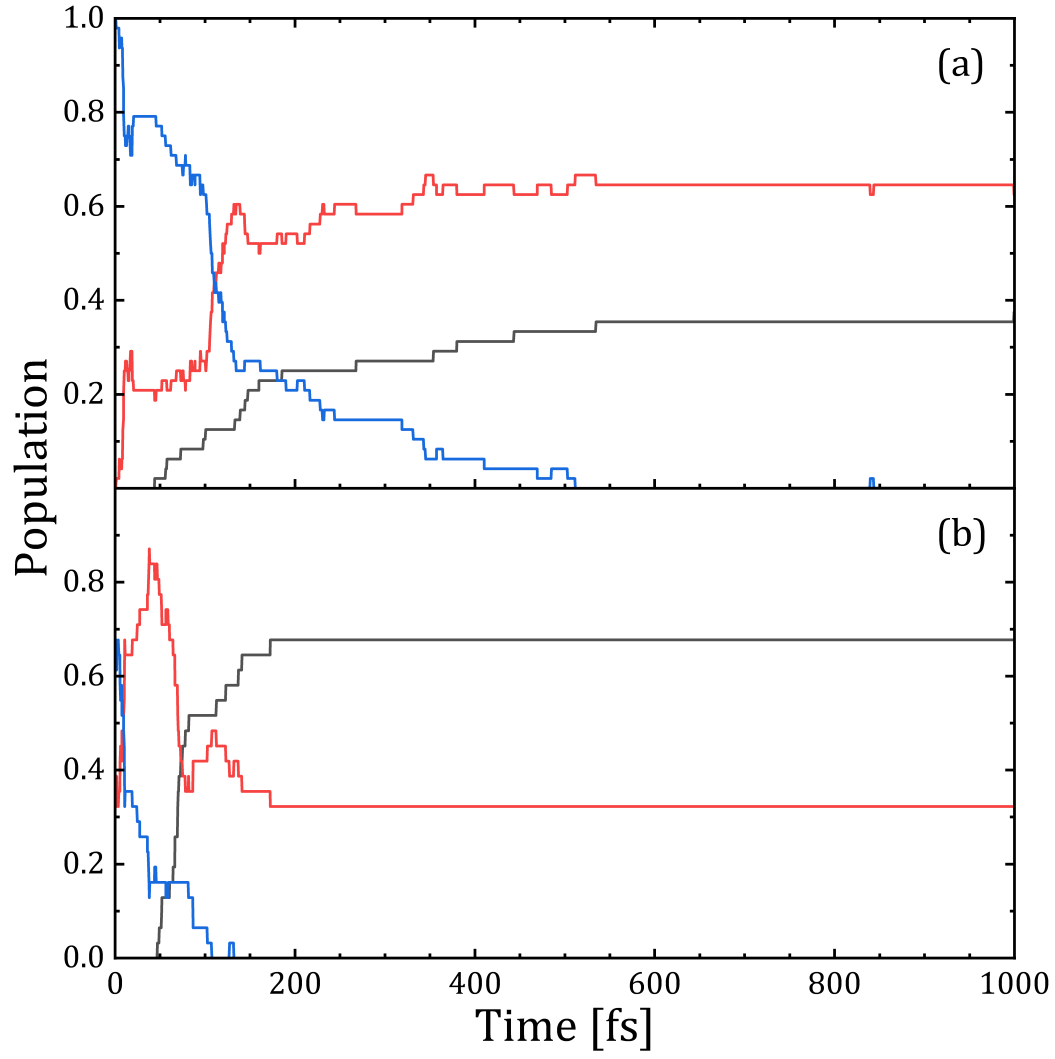

Figure S 2: Average population of the ground state,  $S_0$  (black) and the two lowest excited states  $S_1$  (red) and  $S_2$  (blue) for (a) uracil and (b)  $U(H_2O)_6$ .

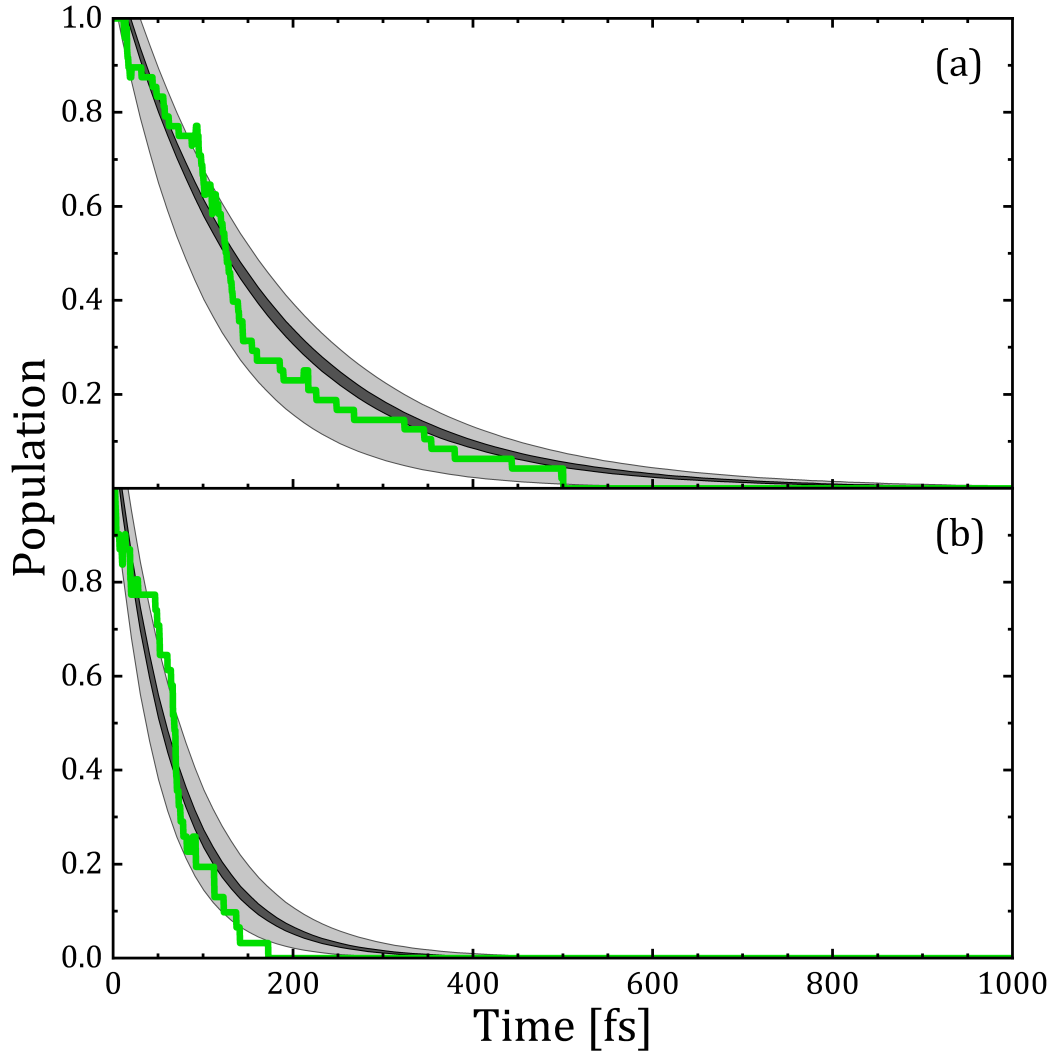

Figure S 3: Average population of the diabatic  $\pi_1\pi_1^*$  state (green) as obtained using 5000 randomly selected structures from the original set of (a) 48 trajectories of U and (b) 31 trajectories of  $\text{U}(\text{H}_2\text{O})_6$  with replacement. The gray areas represent the 95 % confidence interval (dark gray) yielding lifetimes of  $161\pm 6$  fs for U and  $76\pm 3$  fs for  $\text{U}(\text{H}_2\text{O})_6$  and the 95 % prediction interval (light gray) with error margins of  $\pm 40$  fs for U and  $\pm 18$  fs for  $\text{U}(\text{H}_2\text{O})_6$ .

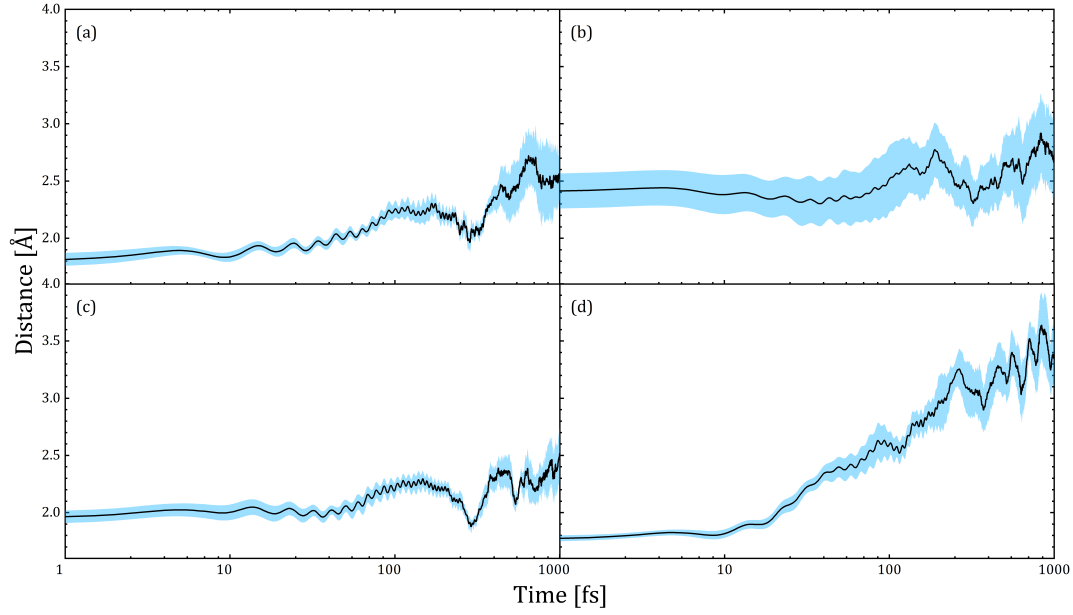

Figure S 4: Time evolution of the hydrogen bond distances in  $\text{U}(\text{H}_2\text{O})_6$  averaged over trajectories that remained in the  $S_1(n_1\pi_1^*)$  state at the end of the simulation. The black curves indicate the mean value of the (a)  $\text{N1-H1}\cdots\text{OH}_2$  (b)  $\text{N3-H3}\cdots\text{OH}_2$  (c)  $\text{C2=O7}\cdots\text{HOH}$  d)  $\text{C4=O8}\cdots\text{HOH}$  distances. The blue shaded areas indicate the margin of error (90% confidence interval).

Table S 1: Comparison of geometrical parameters (in Angstroms and degrees) of U as obtained with MP2/aug-cc-pVDZ and with BLYP-D3/DZVP-GTH.

|          | MP2   | BLYP  |
|----------|-------|-------|
| N1-C2    | 1.39  | 1.42  |
| C2-N3    | 1.39  | 1.41  |
| N3-C4    | 1.41  | 1.44  |
| C4-C5    | 1.46  | 1.47  |
| N1-H1    | 1.01  | 1.02  |
| N3-H3    | 1.02  | 1.02  |
| C4-O8    | 1.23  | 1.24  |
| C2-O7    | 1.23  | 1.24  |
| C5-C6    | 1.37  | 1.37  |
| C2-N1-H1 | 115.1 | 114.9 |
| N3-C2-O7 | 124.1 | 124.5 |
| C4-N3-H3 | 116.2 | 116.2 |
| C5-C4-O8 | 126.1 | 126.4 |

Table S 2: SCS-ADC(2)/aug-cc-pVDZ excitation energies (in eV) and oscillator strengths (in parentheses) of U computed at the MP2/aug-cc-pVDZ optimized ground-state geometry ( $E^{ref}$ ) and at the BLYP-D3/DZVP-GTHD3 optimized ground-state geometry ( $E^{BLYP}$ ). Transitions below 6.85 eV (180 nm) are included. Dominant NTO pairs contributing to the transitions are specified.

| S              | $E^{ref}$       | NTOs                             | $E^{BLYP}$      |
|----------------|-----------------|----------------------------------|-----------------|
| S <sub>1</sub> | 4.88<br>(0.000) | $n_1\pi_1^*$                     | 4.67<br>(0.000) |
| S <sub>2</sub> | 5.36<br>(0.223) | $\pi_1\pi_1^*$                   | 5.19<br>(0.221) |
| S <sub>3</sub> | 6.01<br>(0.004) | $\pi_1\text{Ryd}_1$              | 6.01<br>(0.004) |
| S <sub>4</sub> | 6.19<br>(0.000) | $n_2\pi_2^*$                     | 5.94<br>(0.000) |
| S <sub>5</sub> | 6.42<br>(0.048) | $\pi_2\pi_1^*$                   | 6.19<br>(0.052) |
| S <sub>6</sub> | 6.74<br>(0.038) | $n_1\text{Ryd}_1$                | 6.72<br>(0.022) |
| S <sub>7</sub> | 6.85<br>(0.208) | $\pi_1\pi_2^* + n_1\text{Ryd}_2$ | 6.66<br>(0.231) |
